# Supplementary material for: Cofactor-Activated Phosphorylation Is Required for Inhibition of Cortical Neuron Differentiation by Groucho/TLE1
Source: PubMed Central journal article supplement (PMC2779591; doi:10.1371/journal.pone.0008107), 2009-12-01

# Figure S2

## A

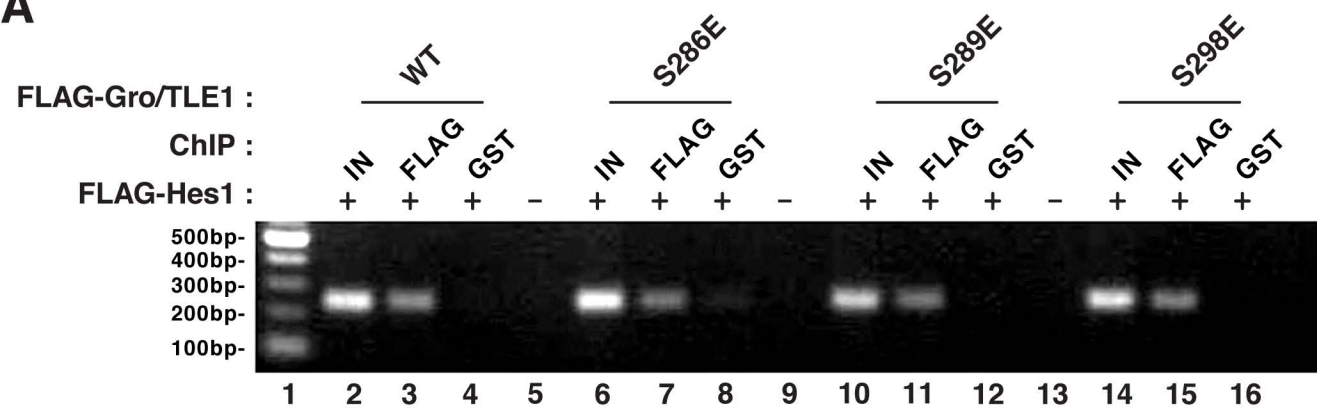

## B

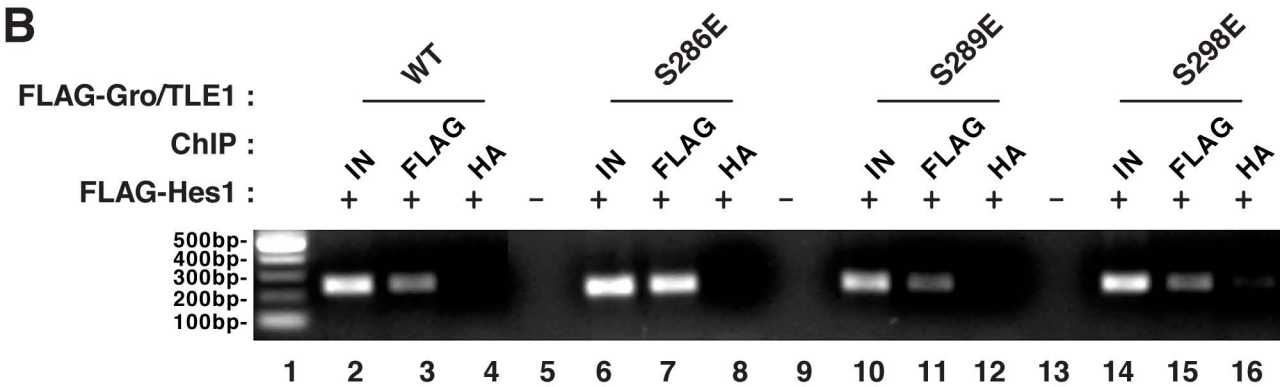

## C

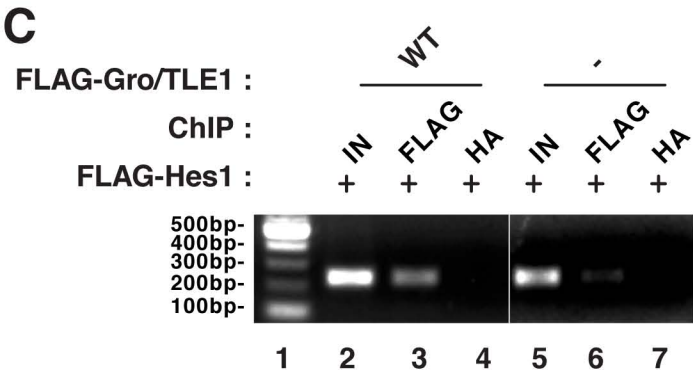

Supplement: pone.0008107.s002.pdf [file pone.0008107.s002.pdf]
